# Supplementary material for: K -mer-based machine learning method to classify LTR-retrotransposons in plant genomes
Source: PeerJ journal article supplement (doi:10.7717/peerj.11456), 2021-05-19

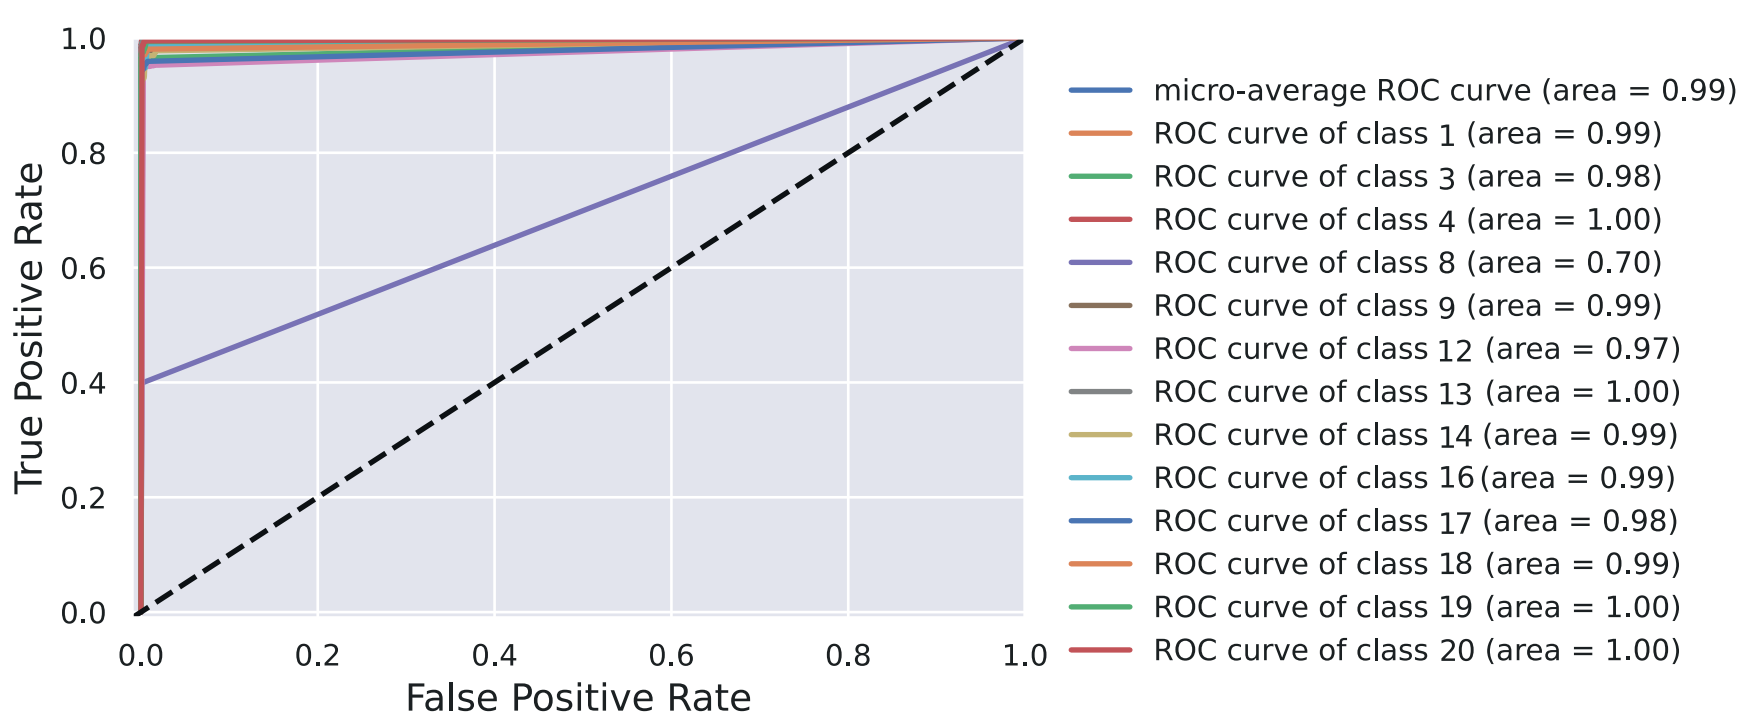

Supplement: Figure_S1.pdf [file Figure_S1.pdf]
