# Supplementary material for: K-mer-based machine learning method to classify LTR-retrotransposons in plant genomes
Source: PeerJ. 2021 May 19;9:e11456. doi: 10.7717/peerj.11456 (PMC8140598; doi:10.7717/peerj.11456)
Supplement: Supplemental Information 2 [file peerj-09-11456-s002.xlsx]

## Sheet: Hoja 1
Feature	Importance
A	199.0
T	179.5
AAAAAA	165.0
ATAT	140.5
AGGGGG	132.5
CCCCCT	132.0
TTTTTT	125.5
AGCT	124.0
GATC	124.0
GATGA	114.5
ACATA	106.5
TATGT	103.5
CTTC	103.0
CCTT	103.0
CTTG	99.5
G	99.5
ATGT	96.5
ACAT	95.0
TCT	95.0
TTAAT	93.0
GA	92.5
AAAG	92.0
CTAC	92.0
CCAT	88.0
TATA	87.5
CTAG	87.0
TAAC	87.0
GGGGAG	86.5
CATC	84.0
GAA	83.5
CTT	83.0
GTTA	83.0
TGCC	82.5
TCTC	82.0
CTTTTT	82.0
AATC	82.0
CCAAT	81.0
TATAT	81.0
CCA	80.0
GTAC	80.0
TCATC	78.5
AGA	78.0
CT	78.0
GGGGGA	77.5
GTA	77.5
ATATA	77.0
C	77.0
ATGC	76.5
CTTT	75.5
AAAAA	75.5
TGGGG	75.5
AAGG	74.5
GGCC	74.5
AAG	74.0
GATG	73.5
AAAGG	73.0
GAAG	72.0
TC	71.5
GC	71.0
TGTA	69.0
TTGA	68.5
CTG	68.0
ATC	68.0
TAC	67.5
GGC	67.5
CATG	67.5
TTC	67.0
CAAG	66.5
AAAAAG	66.5
CAG	66.5
TAGG	66.0
AATGC	65.0
CTTGT	64.5
CCGG	64.0
TATG	64.0
GAATT	63.5
CCAA	63.5
CCTTT	63.5
TCCCCC	63.0
TACAT	63.0
ATATC	62.5
AT	62.5
GAGA	62.0
TTAA	61.5
GTAG	61.5
TACC	61.5
TCAA	61.5
TCTG	61.0
TGG	60.5
AGTT	60.5
GTAA	60.5
TGC	60.5
GGG	60.0
TTTTT	60.0
TGGGGG	60.0
GATAT	59.5
TAAG	59.5
AAGC	59.0
CATTA	59.0
CTGG	59.0
GAAGA	59.0
ACGT	59.0
AAGTC	58.5
AACTC	58.5
GGTGG	58.0
CATGT	58.0
CCCC	57.5
GCAT	57.5
CCAATC	57.5
TCTTC	57.0
GTGT	57.0
TTTT	57.0
CCC	56.5
CAAGT	56.5
TGCA	56.5
ATGTA	56.5
GGAAA	56.0
TTAC	56.0
TTGGC	56.0
TTTGA	55.5
TACA	55.5
AATTC	55.5
GATTGG	55.0
ATGG	55.0
AACT	55.0
GAT	55.0
TCGA	55.0
GAG	54.5
TAG	54.5
ACTTG	54.0
AG	54.0
CTCCCC	53.5
CAACT	53.5
TTCTT	53.0
TCTTG	53.0
CAGT	53.0
TGGA	53.0
TAGC	52.5
ATTGG	52.5
ATCT	52.5
GAGTT	52.5
TGTTT	52.0
GCTT	52.0
GCC	52.0
GAGC	51.5
GGTTTT	51.5
ATTAAT	51.5
GTTATG	51.5
TCATCA	51.5
GATT	51.5
CTTTT	50.5
AAAACC	50.5
AAGCA	50.5
GAAAG	50.5
ACCC	50.5
GAAGT	50.0
CATAA	50.0
GATATC	50.0
TGGTAT	50.0
GGTA	50.0
TTCT	49.0
ATGCC	49.0
GGGT	49.0
AGTGGG	49.0
ATA	49.0
GCATT	49.0
CCATG	48.5
TTGGG	48.5
CACA	48.5
ATG	48.5
CCCCCA	48.5
TTATG	48.0
GCCAA	48.0
CAAAG	48.0
CTCT	48.0
TGATGA	48.0
CCACC	48.0
GAATC	48.0
TCTT	47.5
ATATCT	47.5
CCAC	47.5
CATAAC	47.5
GGTATC	47.5
GCT	47.0
TTGC	47.0
ACAG	46.5
GACTT	46.5
AGAT	46.5
TACATG	46.5
TCG	46.0
AAGAA	46.0
ATGTAT	46.0
TTGAG	46.0
GACT	45.5
CCCACT	45.5
AAAA	45.5
GGAA	45.5
CTAAG	45.5
AAACA	45.0
ATGTC	45.0
TGGCC	45.0
CATCT	44.5
AGTC	44.5
TCACA	44.5
ATGAT	44.5
ACTG	44.5
CC	44.5
CATAT	44.5
AAAGA	44.5
CCTTA	44.5
TATGG	44.5
CCAG	44.0
CTTGA	44.0
CATGG	44.0
GGGTA	44.0
AATCA	44.0
CATA	44.0
GCTTC	44.0
ATTAA	44.0
CCCCA	43.5
GGCA	43.5
TTAT	43.5
ACT	43.5
TCCC	43.5
GAAATG	43.5
ATTC	43.5
GGCCA	43.5
TGAAG	43.5
CTATG	43.0
AAGGG	43.0
AC	43.0
AGC	43.0
CCATA	43.0
AGGG	43.0
GCTTG	43.0
AAGAAG	43.0
ATCA	43.0
TA	42.5
GAAT	42.5
CACC	42.5
TCAG	42.5
GGGG	42.5
ATGATG	42.5
AAGT	42.5
AGAC	42.5
CAGA	42.0
AGT	42.0
CCGA	42.0
CCTA	42.0
CTGA	42.0
ATATG	42.0
GGAT	42.0
CAAT	42.0
CTTTG	42.0
CAAAAA	41.5
TCGG	41.5
ACAC	41.5
GATATG	41.5
AGTA	41.5
ATCGA	41.5
TGGAA	41.5
CTCTG	41.5
TACT	41.5
ATTAT	41.5
TTGGCC	41.0
GG	41.0
AGTGG	41.0
TGCAT	41.0
AATG	41.0
CCAAG	41.0
CTC	41.0
TGCTT	40.5
AGAG	40.5
GAAAA	40.5
GATGG	40.5
TTTCTT	40.5
CCCCC	40.5
TGTGT	40.5
AAC	40.5
CCTG	40.5
TCCT	40.0
TCAAA	40.0
CCCT	40.0
ATAC	40.0
TCA	40.0
AAAAG	40.0
GCG	40.0
GGGGG	40.0
TGGCCA	40.0
